# Supplementary material
Source: publisher figshare collection journal article supplement (https://tandf.figshare.com/articles/dataset/_/963509)
Supplement: Supplementary file 2 [file 1]

Earliest modern bandicoot and bilby (Marsupialia, Peramelidae and Thylacomyidae)  
from the Miocene of the Riversleigh World Heritage Area, northwestern Queensland,  
Australia

K. J. TRAVOUILLO, S. J. HAND, M. ARCHER & K. H. BLACK

Journal of Vertebrate Paleontology

#### SUPPLEMENTARY DATA 1

List and description of 156 characters and states used in our phylogenetic analyses.  
Ordered characters are indicated with an asterisk (\*).

1. Upper incisor number
  - (0) five incisors present
  - (1) four incisors present (I5 lost)
2. Diastema between I4 and I5
  - (0) absent
  - (1) present
3. I5 morphology
  - (0) I5 similar in morphology to I1-4
  - (1) I5 pointed and strongly canine-like
  - (2) I5 premolar like
4. \*Degree of development of lingual shelf on P3
  - (0) no shelf
  - (1) small/weakly developed shelf
  - (2) well-developed lingual shelf
  - (3) well-developed lingual shelf that extends to the buccal side of P3
5. \*P3 major cusp development
  - (0) P3 major cusp laterally compressed
  - (1) P3 major cusp laterally enlarged but not conical
  - (2) P3 major cusp large and conical, but P3 is narrower than M1
  - (3) P3 major cusp large and conical, and P3 is wider than M1
6. \*Stylar crest on M1
  - (0) stylar crest present on stylar cusp D connects to metastylar tip
  - (1) stylar cusp D is a conical cusp not connected to the stylar crest running to the metastylar tip
  - (2) stylar cusp D is a conical cusp and no stylar crest present
7. \*Anterior cingulum of M1
  - (0) no anterior cingulum
  - (1) small anterior cingulum lingual to anterior tip of tooth, no connection to talon
  - (2) Anterior cingulum enlarged and connects to talon as small shelf
8. \*Anterior cingulum of M3
  - (0) no anterior cingulum
  - (1) small anterior cingulum lingual to anterior tip of tooth
  - (2) small anterior cingulum connected to protocone shelf by a small shelf

- (3) large anterior cingulum expanded further up to the protocone
- 9. \*Direction of preparacrista of M1
  - (0) preparacrista anterobuccally orientated to connect to anteriorly positioned St B.
  - (1) preparacrista buccally orientated (perpendicular to tooth row) then posterobuccally orientated
  - (2) preparacrista posterobuccally orientated to connect to posteriorly located St B
  - (3) preparacrista posterobuccally orientated to connect to St B and then reconnects with postparacrista posteriorly
- 10. \*Posterior cingulum of M3
  - (0) absent
  - (1) present
  - (2) present and wide
- 11. \*Morphology of the centrocrista on M1 and M2
  - (0) postparacrista and premetacrista contact each other, forming a complete centrocrista that connects the paracone and metacone (more lingually).
  - (1) postparacrista and premetacrista contact each other, forming a complete centrocrista that connects the paracone and metacone (more buccally)
  - (2) postparacrista does not connect to the premetacrista and ends at the base of St B, premetacrista ends at base of St D
- 12. \*Morphology of centrocrista on M3
  - (0) postparacrista and premetacrista contact each other, forming a complete centrocrista that connects the paracone and metacone (more lingually)
  - (1) postparacrista and premetacrista contact each other, forming a complete centrocrista that connects the paracone and metacone (more buccally)
  - (2) postparacrista does not connect to the premetacrista and ends at the base of St B, premetacrista ends at base of St D
- 13. \*Lobation of i3
  - (0) i3 is unicuspid
  - (1) i3 posterior cusp present but small
  - (2) I3 posterior cusp present and large
- 14. Length of p3
  - (0) p3 longer or equal in length to p2
  - (1) p3 shorter than p2
- 15. Presence of preentocristid
  - (0) present
  - (1) absent
- 16. Direction of preentocristid of m1-3
  - (0) anteroposterior
  - (1) oblique
- 17. Cusp within the hypoflexid region, between the talonid and trigonid on the buccal side
  - (0) no median buccal cusp present
  - (1) median buccal cusp present
- 18. Distinction between lower molar crowns and roots

- (0) crown distinct from roots
- (1) crown and root indistinct (other than for limit of enamel)
- 19. Hypoconulid posterior to entoconid
  - (0) hypoconulid positioned posterobuccal to the entoconid
  - (1) hypoconulid positioned almost directly posterior to the entoconid
- 20. \*Size of talonid on m4
  - (0) entoconid and hypoconid large, talonid relatively wide, crests clearly identifiable
  - (1) entoconid and hypoconid smaller than in state 0, talonid smaller
  - (2) further reduction of entoconid and hypoconid, talonid very small, crest poorly defined
- 21. Snout length and premaxilla size
  - (0) premaxilla taller than it is long; maxilla-nasal contact longer than premaxilla-nasal contact (usually correlated with a relatively short snout)
  - (1) premaxilla longer than it is tall; premaxilla-nasal contact longer than maxilla-nasal contact (usually correlated with a relatively elongate snout)
- 22. Width of nasals
  - (0) broad nasals
  - (1) slender nasals, not markedly expanded posteriorly
- 23. \*Position of nasal-frontal suture/maximum posterior extension of nasals
  - (0) posterior to the anterior rim of the orbit when viewed laterally
  - (1) nasals terminate just anterior to the orbit when viewed laterally (associated with a wide maxilla-frontal suture)
  - (2) nasals terminate well anterior to the anterior margin of the orbit
- 24. Infraorbital canal length
  - (0) long infraorbital canal (longer than half the molar row)
  - (1) short infraorbital canal (shorter or equal to half the molar row)
- 25. Jugal-maxilla contact
  - (0) jugal invades the maxilla and extends onto the facial region of the skull (not bifid)
  - (1) maxilla invades the zygomatic arch so that the jugal has two thin wings around the posterior maxillary flange (bifid)
- 26. \*Lacrimal orbital rim
  - (0) lacrimal crest absent
  - (1) partially developed lacrimal crest
  - (2) fully developed lacrimal crest
- 27. \*Antorbital fossa
  - (0) antorbital fossa absent
  - (1) weak or partial fossa development
  - (2) very deep antorbital fossa
- 28. \*Orbitosphenoid
  - (0) orbitosphenoid identifiable in lateral view as a large ossification

- (1) orbitosphenoid identifiable in lateral view as a small ossification
- (2) orbitosphenoid is very small or absent and not obvious in lateral view
- 29. Alisphenoid
  - (0) alisphenoid-parietal contact
  - (1) squamosal-frontal contact
- 30. \*Sphenorbital fissure and foramen rotundum
  - (0) sphenorbital fissure slightly larger than foramen rotundum. Both canals are tube-like in shape, especially the foramen rotundum
  - (1) sphenorbital fissure is enlarged and more widely open, and there is a reduction in the length of the tube leading to the foramen rotundum
  - (2) sphenorbital fissure is further enlarged and open, and there is no tube leading to the foramen rotundum, which instead appears
- 31. Presence of Accessory fenestrae
  - (0) absent
  - (1) present
- 32. Presence of dividing septa in maxillopalatine fenestrae
  - (0) septum present in maxillopalatine fenestrae
  - (1) septum absent in maxillopalatine fenestrae
- 33. Postglenoid foramen
  - (0) foramen bound by squamosal or squamosal and alisphenoid
  - (1) foramen bounded medially by the petrosal
- 34. Morphology of the primary foramen ovale
  - (0) primary foramen ovale is between alisphenoid and petrosal
  - (1) primary foramen ovale is entirely within the alisphenoid
- 35. \*Morphology of the secondary foramen ovale
  - (0) secondary foramen ovale absent
  - (1) secondary foramen ovale defined by a complete strut or bridge formed by the alisphenoid, but the primary foramen ovale is still visible
  - (2) secondary foramen ovale present, and extensive ossification of the alisphenoid means that the primary foramen ovale is no longer visible in intact skulls
- 36. \*Morphology of the ectotympanic
  - (0) thin
  - (1) somewhat thickened
  - (2) further thickened
  - (3) heavily thickened
- 37. \*Degree of inflation of the alisphenoid tympanic process
  - (0) alisphenoid tympanic process small, lateral and medial walls open.
  - (1) alisphenoid tympanic process largely open but medial wall enclosed greater than in state 0, and hypotympanic sinus is also enlarged relative to state 0
  - (2) alisphenoid tympanic process and hypotympanic sinus further enlarged relative to state 1; hypotympanic sinus walled posteriorly by the alisphenoid

- (3) alisphenoid tympanic process and hypotympanic sinus greatly hypertrophied
- 38. Alisphenoid tympanic process shape
  - (0) flattened
  - (1) ventrally rounded, anterior boundary rounded does not extend as far as the transverse foramen or foramen ovale
  - (2) ventrally rounded, anterior boundary pointed and extends as far as the transverse foramen
  - (3) ventrally angular, anterior boundary pointed and terminates anterior to the transverse foramen
- 39. \*Morphology of the rostral tympanic process of the petrosal
  - (0) rostral tympanic process of the petrosal absent or very small
  - (1) rostral tympanic process of the petrosal forms a distinct projecting process that partially walls the posteromedial margin of the hypotympanic sinus
  - (2) rostral tympanic process of the petrosal further enlarged, forming elongate crest-like process that extends the length of the promontorium and forms posteromedial wall of the hypotympanic sinus; medial margin of petrosal overlaps basioccipital
  - (3) ventral margin of the rostral tympanic process of the petrosal extends laterally and slightly dorsally, resulting in the formation of a distinct hypotympanic sinus within the rostral tympanic process itself
  - (4) further dorsal extension of the ventral margin of the rostral tympanic process relative to state 3, resulting in lateral wall to the hypotympanic sinus within the process
- 40. Epitympanic recess
  - (0) poorly defined and shallow
  - (1) wider and deeper than the plesiomorphic state but still relatively poorly defined
  - (2) deep sinus with enclosing walls that is well distinguished from remainder of auditory cavity
  - (3) wide and deep sinus that extends posterolaterally
- 41. Squamosal epitympanic sinus
  - (0) absent
  - (1) present, poorly defined
  - (2) wide with high posterior wall
  - (3) deep and round
- 42. Supraoccipital shape
  - (0) supraoccipital about as tall as it is wide
  - (1) supraoccipital taller than it is wide
- 43. Postorbital processes
  - (0) absent or indistinct
  - (1) present
- 44. Left and right parietal suture
  - (0) median suture present
  - (1) partially or completely co-ossified suture
- 45. \*Sagittal crest
  - (0) no sagittal crest

- (1) sagittal crest small, not extending to frontals
- (2) sagittal crest large and extending to frontals
- 46. Interparietal
  - (0) absent
  - (1) present
- 47. Lambdoid sesamoids
  - (0) absent
  - (1) present
- 48. \*Number of mental foramen
  - (0) one mental foramen
  - (1) two mental foramina
  - (2) three or more mental foramina
- 49. Shape of I1
  - (0) styliform or chisel-like
  - (1) mesiodistally expanded and flat-crowned
- 50. Upper canine alveolus
  - (0) occupies premaxillary-maxillary suture
  - (1) entirely contained within maxillary
- 51. \*Relative height of P2 and P3
  - (0) P2 taller than P3
  - (1) P2 and P3 subequal in height
  - (2) P3 taller than P2
- 52. Posterior crest of P3
  - (0) well-developed posterior cutting edge
  - (1) lacking posterior cutting edge
- 53. \*Relative height of p2 and p3
  - (0) p2 taller than p3
  - (1) p2 and p3 subequal in height
  - (2) p3 taller than p2
- 54. Hypoconulid notch
  - (0) present in anterior cingulum of m2-4
  - (1) absent
- 55. \*Relative position of hypoconid to protoconid on m3
  - (0) buccally salient to protoconid
  - (1) subequal to protoconid
  - (2) lingual to salient protoconid
- 56. Posterior cingulid
  - (0) absent
  - (1) present
- 57. Shape of narial flange of premaxilla
  - (0) no distinct process
  - (1) wing-like narial processes present
- 58. Position of lacrimal foramen
  - (0) within lacrimal
  - (1) within lacrimal-maxillary suture
- 59. Supraoccipital contribution to foramen magnum
  - (0) contributes to superior margin of foramen magnum
  - (1) exoccipitals contact each other medially, excluding the supraoccipital from the foramen magnum
- 60. Shape of I2-4

- (0) rhomboidal crowns
- (1) mesiodistally expanded and flat-crowned
- 61. Shape of upper canine
  - (0) single-rooted unicuspid upper canine
  - (1) accessory cusps are present on either side of the major cusp of C1
- 62. Lower molar crown height
  - (0) lower molars are as high on the buccal side as they are on the lingual side
  - (1) lower molar height is significantly higher on buccal side than lingual side
- 63. Position of the metacone
  - (0) metacone is directly posterior to the paracone
  - (1) metacone is shifted lingually in relation to the paracone
- 64. Size of I3
  - (0) I2-4 are the same size
  - (1) I3 is larger than I2 and I4
- 65. Lingual cusp presence on lower incisors
  - (0) present
  - (1) absent
- 66. Diastema between i3 and canine
  - (0) no diastema
  - (1) diastema present
- 67. Shape of lower canine
  - (0) single-rooted unicuspid lower canine
  - (1) accessory cusps are present on either side of the major cusp of c1
- 68. Size of upper or lower canine
  - (0) large, raised above premolars
  - (1) small, about as high as premolars
- 69. \*Diastema between C1 and P1
  - (0) no diastema
  - (1) short, less than the length of P1
  - (2) long, more than the length of P1
- 70. \*Length of P1
  - (0) P1 is shorter than P2
  - (1) P1 is as long as P2
  - (2) P1 is longer than P2
- 71. Anterior cusp of P1 and/or P2
  - (0) tall distinct cusp
  - (1) small remnant or no cusp
- 72. \*Diastema between P1 and P2
  - (0) no diastema
  - (1) short, less than the length of p1
  - (2) long, more than the length of p1
- 73. Morphology of the central cusp of P1 and P2
  - (0) central cusp is not inflated
  - (1) central cusp is inflated widening the tooth anteriorly
- 74. \*Relative length of P2 and P3
  - (0) P3 almost twice as long as P2

- (1) P2 shorter than P3
- (2) P2 and P3 subequal length
- (3) P2 longer than P3
- (4) P2 twice as long as P3
- 75. \*Diastema between canine and p1
  - (0) no diastemata
  - (1) short, less than the length of p1
  - (2) long, more than the length of p1
- 76. Length of p1
  - (0) p1 is shorter than either p2 or p3
  - (1) p1 is as long as p2 or p3
- 77. Anterior cusp of p1
  - (0) tall distinct cusp
  - (1) none or small remnant
- 78. Anterior cusp of p2
  - (0) tall distinct cusp
  - (1) none or small remnant
- 79. \*Diastema between p1 and p2
  - (0) no diastemata
  - (1) short, less than the length of p1
  - (2) long, more than the length of p1
- 80. \*Relative length of p2 and p3
  - (0) p3 almost twice as long as p2
  - (1) p2 shorter than p3
  - (2) p2 and p3 subequal length
  - (3) p2 longer than P3
- 81. Anterior cusp of p3
  - (0) tall distinct cusp
  - (1) none or small remnant
- 82. p3 major cusp development
  - (0) p3 major cusp laterally compressed
  - (1) p3 major cusp very large
- 83. Reclining of p3
  - (0) the anterior and posterior roots of p3 are level
  - (1) the anterior root of p3 is more exposed than the posterior root, reclining p3 toward m1
- 84. \*Size of stylar cusp A on M1
  - (0) stylar cusp A is large, with a long crest running anteroposteriorly
  - (1) stylar cusp A is small, with a short or no crest running anteroposteriorly
  - (2) stylar cusp A remnant or no stylar cusp A
- 85. Morphology of stylar cusp B/C on M1
  - (0) no stylar cusp B or C
  - (1) stylar cusp B and C are distinct cusps
  - (2) stylar cusp B and C are fused and oval in shape connected by a stylar crest but clearly identifiable as separate cusp
  - (3) stylar cusp B and C are fused and oval in shape connected by a stylar crest but difficult to clearly identify each cusp
- 86. \*Relative size of stylar cusp B and C on M1



- (0) stylar cusp B larger than stylar cusp C
- (1) stylar cusp B subequal to stylar cusp C
- (2) stylar cusp C larger than stylar cusp B
- 87. Connection of stylar cusp B and D on M1
  - (0) stylar cusp B/C and D are connected by a series of crests
  - (1) stylar cusp B/C and D are not connected by any crests
- 88. \*Posterior cingulum of M1
  - (0) absent
  - (1) present
  - (2) present and wide
- 89. \*Termination of postprotocrista on M1
  - (0) postprotocrista ends on anterior flank of metacone
  - (1) postprotocrista ends on lingual flank of metacone
  - (2) postprotocrista ends on posterolingual flank of metacone
  - (3) postprotocrista joins with the posterior cingulum and ends posteriorly to the midpoint of the postmetacrista
  - (4) postprotocrista joins with the posterior cingulum and ends at the lingual flank of the metastylar tip
- 90. \*Position of metaconule on M1
  - (0) metaconule is directly positioning at the base of the metacone
  - (1) a small shelf is between the base of the metacone and the metaconule
  - (2) a larger shelf is between the base of the metacone and the metaconule
- 91. Stylar cusp D1 on M1
  - (0) present
  - (1) absent
- 92. \*Stylar cusp E on M1
  - (0) stylar cusp E present as a distinct cusp
  - (1) remnant of stylar cusp E as a stylar crest or small cusp
  - (2) no stylar cusp E (no stylar crest),
- 93. \*Anterior cingulum of M2
  - (0) no anterior cingulum
  - (1) small anterior cingulum lingual to anterior tip of tooth
  - (2) small anterior cingulum connected to protocone shelf by a small shelf
  - (3) large anterior cingulum expanded further up to the protocone
- 94. \*Size of stylar cusp A on M2
  - (0) stylar cusp A is large, with a long crest running anteroposteriorly
  - (1) stylar cusp A is small, with a short or no crest running anteroposteriorly
  - (2) no stylar cusp A
- 95. Morphology of stylar cusp B on M2
  - (0) stylar cusp B is oval with a stylar crest running through it
  - (1) stylar cusp B is conical with no stylar crest connection
- 96. Connection of stylar cusp B and D on M2
  - (0) stylar cusp B and D are connected by a series of crests
  - (1) stylar cusp B and D are not connected by any crests
- 97. \*Direction of preparacrista of M2

- (0) preparacrista terminates at base of stylar cusp B (no crest connection).
  - (1) preparacrista terminates at the tip stylar cusp B.
  - (2) preparacrista connects to stylar cusp B with a weak connection to stylar cusp A
  - (3) preparacrista connects to parastylar tip/stylar cusp A
- 98. \*Stylar crest on M2
  - (0) stylar crest present on stylar cusp D connects to metastylar tip
  - (1) stylar cusp D is a conical cusp not connected to the stylar crest running to the metastylar tip
  - (2) stylar cusp D is a conical cusp and no stylar crest present
- 99. \*Posterior cingulum of M2
  - (0) absent
  - (1) present
  - (2) present and wide
- 100. \*Termination of postprotocrista on M2
  - (0) postprotocrista ends on anterior flank of metacone
  - (1) postprotocrista ends on lingual flank of metacone
  - (2) postprotocrista ends on posterolingual flank of metacone
  - (3) postprotocrista joins with the posterior cingulum and ends posteriorly to the midpoint of the postmetacrista
  - (4) postprotocrista joins with the posterior cingulum and ends at the lingual flank of the metastylar tip
- 101. \*Position of metaconule on M2
  - (0) metaconule is directly positioning at the base of the metacone
  - (1) a small shelf is between the base of the metacone and the metaconule
  - (2) a larger shelf is between the base of the metacone and the metaconule
- 102. \*Stylar cusp C on M2
  - (0) Present as tall cusp
  - (1) small remnant present
  - (2) absent
- 103. Stylar cusp D1 on M2
  - (0) present
  - (1) absent
- 104. \*Stylar cusp E on M2
  - (0) stylar cusp E present as a distinct cusp
  - (1) remnant of stylar cusp E as a stylar crest
  - (2) no stylar cusp E (no stylar crest)
- 105. \*Size of stylar cusp A on M3
  - (0) stylar cusp A is large, with a long crest running anteroposteriorly
  - (1) stylar cusp A is small, with a short or no crest running anteroposteriorly
  - (2) no stylar cusp A
- 106. Morphology of stylar cusp B on M3
  - (0) stylar cusp B is oval with a stylar crest running through it
  - (1) stylar cusp B is conical with no stylar crest connection (except by wear)

107. Connection of stylar cusp B and D on M3
  - (0) stylar cusp B and D are connected by a series of crests
  - (1) stylar cusp B and D are not connected by any crests,
108. \*Direction of preparacrista of M3
  - (0) preparacrista terminates at base of stylar cusp B (no crest connection).
  - (1) preparacrista terminates at the tip stylar cusp B.
  - (2) preparacrista connects a crest linking stylar cusp A and stylar cusp B
  - (3) preparacrista connects to parastylar tip/stylar cusp A
109. \*Stylar crest on M3
  - (0) stylar crest present on stylar cusp D connects to metastylar tip
  - (1) stylar cusp D is a conical cusp not connected to the stylar crest running to the metastylar tip
  - (2) stylar cusp D is a conical cusp and no stylar crest present
110. \*Termination of postprotocrista/posthypocrista on M3
  - (0) postprotocrista ends on anterior flank of metacone
  - (1) postprotocrista ends on lingual flank of metacone
  - (2) postprotocrista ends on posterolingual flank of metacone
  - (3) postprotocrista joins with the posterior cingulum and ends posteriorly to the midpoint of the postmetacrista
  - (4) postprotocrista joins with the posterior cingulum and ends at the lingual flank of the metastylar tip
111. \*Position of metaconule on M3
  - (0) metaconule is directly positioning at the base of the metacone
  - (1) a small shelf is between the base of the metacone and the metaconule
  - (2) a larger shelf is between the base of the metacone and the metaconule
112. \*Stylar cusp C on M3
  - (0) present as tall cusp
  - (1) small remnant present
  - (2) absent
113. Stylar cusp D1 on M3
  - (0) present
  - (1) absent
114. \*Stylar cusp E on M3
  - (0) stylar cusp E present as a distinct cusp
  - (1) remnant of stylar cusp E as a stylar crest
  - (2) no stylar cusp E (no stylar crest),
115. \*Anterior cingulum of M4
  - (0) no anterior cingulum
  - (1) small anterior cingulum lingual to anterior tip of tooth
  - (2) small anterior cingulum connected to protocone shelf by a small shelf
  - (3) large anterior cingulum expanded further up to the protocone
116. \*Stylar cusp B on M4
  - (0) no stylar cusp B
  - (1) small stylar cusp B
  - (2) large stylar cusp B

- 117. Connection of stylar A and B on M4
  - (0) no connection
  - (1) crest connecting the two cusps
- 118. Direction of preparacrista of M4
  - (0) preparacrista terminates stylar cusp A
  - (1) preparacrista terminates at the anterior flank of stylar cusp B
- 119. Postparacrista of M4
  - (0) postparacrista straight
  - (1) postparacrista curves as a small centrocrista and ends just after the centrocrista
- 120. \*Termination of postprotocrista on M4
  - (0) postprotocrista ends anterior to the most posterior end of the postparacrista
  - (1) postprotocrista ends level with the most posterior end of the postparacrista
  - (2) postprotocrista ends posterior to the most posterior end of the postparacrista
- 121. \*Metacone on M4
  - (0) absent
  - (1) small metacone raise above the postparacrista
  - (2) large metacone expands the length of the tooth
- 122. Stylar cusp C/D on M4
  - (0) absent
  - (1) present
- 123. Presence of protocone on M4
  - (0) present
  - (1) absent
- 124. Anterior cingulid on m1
  - (0) absent or small remnant
  - (1) present
- 125. Hypoflexid on m1
  - (0) absent
  - (1) present
- 126. \*Shape of trigonid on m1
  - (0) paraconid-metaconid distance is longer than metaconid- protoconid distance
  - (1) paraconid-metaconid distance is as long as metaconid- protoconid distance
  - (2) paraconid-metaconid distance is shorter than metaconid- protoconid distance
  - (3) paraconid highly reduced or absent
- 127. Position of paraconid on m1
  - (0) paraconid anterior to metaconid
  - (1) paraconid anterobuccal to metaconid
- 128. Shape of unworn entoconid on m1-3
  - (0) oval
  - (1) triangular (wider posteriorly than anteriorly)
  - (2) conical
- 129. \*Cristid obliqua termination on m1
  - (0) cristid obliqua terminates buccal to level with the protocone

- (1) cristid obliqua terminates lingual to the protocone to the midpoint to the tooth width
- (2) cristid obliqua terminates lingual to the midpoint of the tooth width
- 130. Posthypocristid direction on m1
  - (0) oblique to the tooth row axis
  - (1) perpendicular to the tooth row axis
- 131. Connection of posthypocristid on m1
  - (0) posthypocristid connects to hypoconulid
  - (1) posthypocristid connects to base of entoconid when the tooth is unworn, but as the tooth wears down, a crest connects the tip of the entoconid to the posthypocristid
- 132. Size of hypoconulid on m1
  - (0) large distinct cusp
  - (1) small cusp
- 133. \*Shape of trigonid on m2
  - (0) paraconid-metaconid distance is longer than metaconid-protoconid distance
  - (1) paraconid-metaconid distance is as long as metaconid-protoconid distance
  - (2) paraconid-metaconid distance is shorter than metaconid-protoconid distance
  - (3) paraconid highly reduced or absent
- 134. \*Cristid obliqua termination on m2
  - (0) cristid obliqua terminates buccal to the protocone
  - (1) cristid obliqua terminates lingual to the protocone about midpoint to the tooth width
  - (2) cristid obliqua terminates lingual to the midpoint of the tooth width
- 135. Posthypocristid direction on m2
  - (0) oblique to the tooth row axis
  - (1) perpendicular to the tooth row axis
- 136. Connection of posthypocristid on m2
  - (0) posthypocristid connects to hypoconulid
  - (1) posthypocristid connects to entoconid
- 137. \*Size of hypoconulid on m2
  - (0) large distinct cusp
  - (1) small cusp
  - (2) hypoconulid absent
- 138. \*Shape of trigonid on m3
  - (0) paraconid-metaconid distance is longer than metaconid-protoconid distance
  - (1) paraconid-metaconid distance is as longer as metaconid-protoconid distance
  - (2) paraconid-metaconid distance is shorter than metaconid-protoconid distance
  - (3) paraconid highly reduced or absent
- 139. \*Cristid obliqua termination on m3
  - (0) cristid obliqua terminates buccal to the protocone

- (1) cristid obliqua terminates lingual to the protocone about midpoint to the tooth width
  - (2) cristid obliqua terminates lingual to the midpoint of the tooth width
- 140. Posthypocristid direction on m3
  - (0) oblique to the tooth row axis
  - (1) perpendicular to the tooth row axis
- 141. Connection of posthypocristid on m3
  - (0) posthypocristid connects to hypoconulid
  - (1) posthypocristid connects to entoconid
- 142. \*Size of hypoconulid on m3
  - (0) large distinct cusp
  - (1) small cusp
  - (2) hypoconulid absent
- 143. \*Shape of trigonid on m4
  - (0) paraconid-metaconid distance is longer than metaconid-protoconid distance
  - (1) paraconid-metaconid distance is as longer as metaconid-protoconid distance
  - (2) paraconid-metaconid distance is shorter than metaconid-protoconid distance
  - (3) paraconid highly reduced or absent
- 144. Preentocristid on m4
  - (0) present
  - (1) absent
- 145. Preentocristid orientation on m4
  - (0) anteroposterior
  - (1) oblique
- 146. Postentocristid on m4
  - (0) absent
  - (1) present
- 147. Postentocristid orientation on m4
  - (0) anteroposterior
  - (1) oblique
- 148. Cristid obliqua termination on m4
  - (0) cristid obliqua terminates lingual to the protocone about midpoint to the tooth width
  - (1) cristid obliqua terminates lingual to the midpoint of the tooth width
- 149. \*Posthypocristid direction on m4
  - (0) oblique to the tooth row axis
  - (1) perpendicular to the tooth row axis
  - (2) anteriorly oriented
- 150. \*Size of entoconid
  - (0) large distinct cusp
  - (1) small cusp
  - (2) entoconid absent
- 151. \*Size of hypoconulid on m4
  - (0) large distinct cusp
  - (1) small cusp

- (2) hypoconulid absent
- 152. Buccal shelf on m4
  - (0) buccal shelf end at buccal side of hypoconid
  - (1) buccal shelf buccally reduced (hypoconid more buccal than shelf)
- 153. Presence of P3
  - (0) present
  - (1) absent
- 154. Presence of p3
  - (0) present
  - (1) absent
- 155. Presence of palatine fenestrae
  - (0) absent
  - (1) present
- 156. Presence of maxillary fenestrae
  - (0) absent
  - (1) present
